even in the absence of outcome data, we suggest using troponin as the primary criteria for identifying clinically significant myocardial injury in all perioperative settings.

We respectfully disagree with Archan *et al.*<sup>1</sup> regarding the relevance of differentiating between myocardial injury and myocardial infarction. They correctly point out that troponin elevation may result from a variety of etiologies, including physiologic stress associated with marathon running or mountain climbing.<sup>5</sup> Furthermore, the extraordinary sensitivity of currently available biomarker assays permits detection of a single troponin molecule release even after minimal exercise.<sup>6</sup> At present, however, imaging modalities and cellular detection technology are unable to differentiate between troponin release from the cytosol or damaged cells that are likely to recover (myocardial injury) and irreversible cellular necrosis (myocardial infarction). Therefore, we suggest that increased concentrations of circulating troponin, in fact, reflect a spectrum of myocardial injury. Consequently, the assignment of a specific cutoff point in an attempt to differentiate between injury and infarction may be counterproductive to efficient identification of therapeutic interventions.

**Jochen D. Muehlschlegel, M.D., M.Sc.,\* Stanton K. Shernan, M.D., Simon C. Body, M.B.Ch.B., M.P.H.**

\*Brigham and Women's Hospital, Boston, Massachusetts.  
jmuehlschlegel@partners.org

## References

1. Archan S, Fleisher LA: From creatine kinase-MB to troponin: The adoption of a new standard. *ANESTHESIOLOGY* 2010; 112: 1005-12
2. Muehlschlegel JD, Perry TE, Liu KY, Nascimben L, Fox AA, Collard CD, Avery EG, Aranki SF, D'Ambra MN, Shernan SK, Body SC, CABG Genomics Investigators: Troponin is superior to electrocardiogram and creatinine kinase MB for predicting clinically significant myocardial injury after coronary artery bypass grafting. *Eur Heart J* 2009; 30:1574-83
3. Thygesen K, Alpert JS, White HD, Joint ESC/ACCF/AHA/WHF Task Force for the Redefinition of Myocardial Infarction, Jaffe AS, Apple FS, Galvani M, Katus HA, Newby LK, Ravkilde J, Chaitman B, Clemmensen PM, Dellborg M, Hod H, Porela P, Underwood R, Bax JJ, Beller GA, Bonow R, Van der Wall EE, Bassand JP, Wijns W, Ferguson TB, Steg PG, Uretsky BF, Williams DO, Armstrong PW, Antman EM, Fox KA, Hamm CW, Ohman EM, Simoons ML, Poole-Wilson PA, Gurfinkel EP, Lopez-Sendon JL, Pais P, Mendis S, Zhu JR, Wallentin LC, Fernández-Avilés F, Fox KM, Parkhomenko AN, Priori SG, Tendera M, Voipio-Pulkki LM, Vahanian A, Camm AJ, De Caterina R, Dean V, Dickstein K, Filippatos G, Funck-Brentano C, Hellemans I, Kristensen SD, McGregor K, Sechtem U, Silber S, Widimsky P, Zamorano JL, Morais J, Brener S, Harrington R, Morrow D, Lim M, Martinez-Rios MA, Steinhubl S, Levine GN, Gibler WB, Goff D, Tubaro M, Dudek D, Al-Attar N: Universal definition of myocardial infarction. *Circulation* 2007; 116:2634-53
4. Priebe HJ: Perioperative myocardial infarction—etiology and prevention. *Br J Anaesth* 2005; 95:3-19
5. Apple FS, Quist HE, Otto AP, Mathews WE, Murakami MM: Release characteristics of cardiac biomarkers and ischemia-modified albumin as measured by the albumin cobalt-binding test after a marathon race. *Clin Chem* 2002; 48:1097-100
6. Sabatine MS, Morrow DA, de Lemos JA, Jarolim P, Braunwald E: Detection of acute changes in circulating troponin in the setting of transient stress test-induced myocardial

ischaemia using an ultrasensitive assay: Results from TIMI 35. *Eur Heart J* 2009; 30:162-9

(Accepted for publication August 24, 2010.)

## On Memory, General Anesthesia, and Sleep

*To the Editor:*

I read with great interest the erudite editorial that accompanied the article by Pham *et al.*<sup>2</sup> by my colleague, Professor Lichtor.<sup>1</sup> In their article, Pham *et al.*<sup>2</sup> found no evidence of implicit memory formation during anesthesia in children.

Without providing clear and concise answers, Lichtor<sup>1</sup> asks the following question: *Is memory formation during anesthesia similar to what goes on during sleep?* General anesthesia abolishes explicit or conscious memory except in the rare cases of awareness during anesthesia.<sup>3</sup> The evidence for memory formation beyond unconsciousness is controversial. It may occur only during light anesthesia, short of consciousness.<sup>4</sup> When it occurs, there is only evidence of perceptual, but not conceptual, priming.<sup>5</sup> As for sleep, Lichtor<sup>1</sup> notes there is evidence that it contributes to the consolidation of some types of explicit memory. There are also some reports that it enhances the learning of motor and perceptual skills.<sup>6</sup>

Lichtor<sup>1</sup> asks another question: *Would patients have better postoperative control of pain and anxiety if therapeutic instructions are given both preoperatively and intraoperatively?* My answer has to be negative. For patients to comprehend instructions during anesthesia, there must be conceptual priming, which does not occur during anesthesia—except at its lightest levels (*e.g.*, nitrous oxide, opioids, and muscle relaxants),<sup>7</sup> where conscious encoding of stimuli is still possible.<sup>5</sup> After a 1988 report that claimed improved recovery and reduced hospital stay for patients after surgery,<sup>8</sup> nearly all credible and controlled studies failed to replicate this finding or other beneficial findings relating to postsurgical analgesia, nausea and vomiting, cessation of smoking, and so on.<sup>9</sup> The suggestion by Lichtor<sup>1</sup> that anesthesia might be similar to sleep processes that facilitate memory consolidation cannot be true because anesthetics abolish memory by *suppression* of consolidation.<sup>10-12</sup>

Finally, although Hermann Ebbinghaus introduced many important ideas and methods for memory research (with himself as the sole subject) in the late 19th century, I would attribute the introduction of implicit or nonconscious forms of human memory to the literature at a much later date. The first suggestion that conscious or implicit memory exists was in 1957, when Scoville and Milner reported the case of patient H.M., who after surgery for epilepsy was unable to convert a new short-term memory into a permanent long-

The above letter was sent to the authors of the referenced report. The authors did not wish to reply.—James C. Eisenach, M.D., Editor-in-Chief.

term memory.<sup>13</sup> He could, however, learn new motor skills without any awareness that he had ever before performed the tasks. Research into implicit memory exploded in the early 1980s.<sup>13</sup>

The above comments should not, however, obscure my agreement with my colleague's outstanding statement that, "although there are some similarities between anesthesia and sleep, general anesthesia is not really the same as sleep."

**Mohamed M. Ghoneim, M.D.**, University of Iowa, Iowa City. mohamed-ghoneim@uiowa.edu

## References

1. Lichtor JL: Anesthesia teaching: Is it a brave new world? *ANESTHESIOLOGY* 2010; 112:1063-4
2. Pham X, Smith KR, Sheppard SJ, Bradshaw C, Lo E, Davidson AJ: Implicit memory formation during routine anesthesia in children: A double-masked randomized controlled trial. *ANESTHESIOLOGY* 2010; 112:1097-104
3. Ghoneim MM: Awareness during anesthesia. *ANESTHESIOLOGY* 2000; 92:597-602
4. Kerssens C, Alkire M: Memory formation during general anesthesia, Consciousness, Awareness, and Anesthesia. Edited by Mashour GA. New York, Cambridge University Press, 2010, pp 47-73
5. Andrade J, Deeprose C: Unconscious memory formation during anaesthesia. *Best Pract Res Clin Anaesthesiol* 2007; 21:385-401
6. Walker MP, Stickgold R: Sleep, memory, and plasticity. *Annu Rev Psychol* 2006; 57:139-66
7. Ghoneim MM, Block RI, Dhanaraj VJ, Todd MM, Choi WW, Brown CK: Auditory evoked responses and learning and awareness during general anesthesia. *Acta Anaesthesiol Scand* 2000; 44:133-43
8. Evans C, Richardson PH: Improved recovery and reduced postoperative stay after therapeutic suggestions during general anesthesia. *Lancet* 1988; 2:491-3
9. Block RI, Ghoneim MM, Sum Ping ST, Ali MA: Efficacy of therapeutic suggestions for improved postoperative recovery presented during general anesthesia. *ANESTHESIOLOGY* 1991; 75:746-55
10. Veselis RA, Pryor KO: Propofol amnesia: what's going on in the brain? *Suppressing the Mind: Anesthetic Modulation of Memory and Consciousness*. Edited by Hudits A, Pearce R. New York, Humana Press, 2010, pp 215-43
11. Veselis RA, Pryor KO, Reinsel RA, Mehta M, Pan H, Johnson R Jr: Low-dose propofol-induced amnesia is not due to a failure of encoding: Left inferior prefrontal cortex is still active. *ANESTHESIOLOGY* 2008; 109:213-24
12. Alkire MT, Beydoun T, Miyashita T, McReynolds JR, Guzowski JF: Toward the mechanism of anesthetic-induced amnesia: Anesthetics shut down memory consolidation by inhibiting hippocampal Arc-protein synthesis in the rat [abstract]. *Anesth Analg* 2007; 104:S213
13. Schacter DL: *Searching for memory*. New York, Basic Books, 1996, pp 161-91

(Accepted for publication September 1, 2010.)
